# Supplementary material for: Structural basis for conductance through TRIC cation channels
Source: PubMed Central journal article supplement (PMC5477506; doi:10.1038/ncomms15103), 2017-05-19
Supplement: ncomms15103-s1.pdf [file ncomms15103-s1.pdf]

**Supplementary Table 1 | Parameters for Calculation of Sequence Conservation**

|                                        | Prokaryotic TRICs              | Eukaryotic TRICs                |
|----------------------------------------|--------------------------------|---------------------------------|
| Homolog search algorithm               | PSI-BLAST                      | PSI-BLAST                       |
| Number of iterations                   | 5                              | 5                               |
| E-value cutoff                         | 0.0001                         | 0.0001                          |
| Proteins database                      | UNIREF-90                      | UNIREF-90                       |
| Maximum homologs to collect            | 500                            | 500                             |
| Maximal %ID between sequences          | 95                             | 95                              |
| Minimal %ID for homologs               | 35                             | 35                              |
| Alignment method                       | MAFFT                          | MAFFT                           |
| Method of calculation                  | Bayesian                       | Bayesian                        |
| Model of substitution for protein      | Best fit                       | Best fit                        |
|                                        |                                |                                 |
| Query Sequence (gi Number)             | 499597352<br>( <i>Sa</i> TRIC) | 74733603<br>( <i>Hs</i> TRIC-A) |
| Total unique sequences for calculation | 100                            | 169                             |

**Supplementary Table 2. Summary table for crystallization and structural analyses of SaTRIC and CpTRIC**

| Protein name                                                       | SaTRIC                                                                     |                                                                                  |                                                                               |                                                                              | CpTRIC                                                                            |
|--------------------------------------------------------------------|----------------------------------------------------------------------------|----------------------------------------------------------------------------------|-------------------------------------------------------------------------------|------------------------------------------------------------------------------|-----------------------------------------------------------------------------------|
|                                                                    | Crystal name                                                               | Type 1                                                                           | Type 2a                                                                       | Type 2b                                                                      |                                                                                   |
| Molecular Construct                                                | 1-207,<br>L148M/L180M                                                      | 1-207,<br>WT,                                                                    | 1-207,<br>WT,                                                                 | 1-207,<br>WT,                                                                | 1-219,<br>WT,                                                                     |
| Protein type                                                       | Se-Met                                                                     | Native                                                                           | Native                                                                        | Native                                                                       | Se-Met                                                                            |
| Protein Solution                                                   | HEPES 20mM pH7.5,<br>NaCl 200mM,<br>DM 4mM                                 | HEPES 20mM pH7.5,<br>NaCl 200mM,<br>DM 4mM                                       | HEPES 20mM pH7.5,*<br>RbCl 200mM,<br>DM 4mM                                   | HEPES 20mM pH7.5,<br>NaBr 200mM,<br>DM 4mM                                   | HEPES 20mM pH7.5,<br>NaCl 200mM,<br>OM 40mM                                       |
| Wavelength                                                         | 0.97853 Å                                                                  | 0.97876 Å                                                                        | 0.81530 Å                                                                     | 0.91532 Å                                                                    | 0.97876 Å                                                                         |
| Space group                                                        | P321                                                                       | P6 <sub>(3)</sub>                                                                | P6 <sub>(3)</sub>                                                             | R32                                                                          | R32                                                                               |
| Resolution                                                         | ~3.1 Å                                                                     | ~1.6 Å                                                                           | ~1.8 Å                                                                        | ~2.4 Å                                                                       | ~2.4 Å                                                                            |
| Solution for crystallization                                       | PEG200 40%,<br>NaCl 100mM,<br>MgCl <sub>2</sub> 100mM,<br>MES pH 6.0 100mM | PEG200 40%,<br>Li <sub>2</sub> SO <sub>4</sub> 100mM,<br>Na-Citrate pH 5.5 50 mM | PEG200 38%,<br>RbCl 100mM,<br>MgCl <sub>2</sub> 100mM,<br>HEPES pH 7.0 100mM, | PEG200 40%<br>Li <sub>2</sub> SO <sub>4</sub> , 100mM,<br>HEPES pH 7.0 100mM | PEG400 38%,<br>NaCl 100mM,<br>CdCl <sub>2</sub> 100mM,<br>Tris-HCl, pH8.5, 100mM, |
| Method for crystallization                                         | LCP                                                                        | LCP                                                                              | LCP                                                                           | LCP                                                                          | Detergent micelle                                                                 |
| Beamline Facility                                                  | SSRF BL19U1                                                                | SSRF BL19U1                                                                      | APS 24IDE                                                                     | SSRF BL19U1                                                                  | SSRF BL19U1                                                                       |
| See a string of water molecules within the ion translocation pore? |                                                                            | Yes, 9 water molecules                                                           | Yes, 9 water molecules                                                        | Unmodelled density                                                           | Yes, 6 water molecules                                                            |
| Ion binding                                                        |                                                                            | 2 Na <sup>+</sup> , along the trimeric three-fold axis                           | 1 Mg <sup>2+</sup> , along the trimeric three-fold axis                       | Not determined                                                               | 4 Cd <sup>2+</sup>                                                                |
| Conformation for the N-THB (TM1-3)                                 |                                                                            | Unlocked                                                                         | Unlocked                                                                      | Unlocked                                                                     | Unlocked                                                                          |
| Conformation for the C-THB (TM4-6)                                 |                                                                            | Locked                                                                           | Locked                                                                        | Unlocked                                                                     | Locked                                                                            |
| Conformation of ion translocation pore                             |                                                                            | Closed                                                                           | Closed                                                                        | Open                                                                         | Closed                                                                            |

\* The pH for the HEPES buffer was adjusted by using NH<sub>4</sub>OH.

**a.**

```

          TM1/TM4                TM2/TM5                H23/H56                TM3/TM6
SaTRIC-N  7  I V F D I F N Y I G I V A F A I S G A I K A V K K G M D L L G V L V L G F S T A L G G G I I S N L L L G K T P P T N L I Y P Y P I T A F L A S L A T F V F Y R I F
SaTRIC-C  93 K P L L Y A D A I G L G A F A S S G A S L A Y S V S N N V I L V V I V G A I T A V G G G V I R D I L S N E - V P L L L T R E F Y A T T A V I G S F V Y F I A S D L -
      :   :   * : * : * * * * *   *   .   .   : :   * : : *   * : * * : *   : *   .   .   *   *   *   .   : * :   * :   :
      1: SaTRIC-N           100.00    31.25
      2: SaTRIC-C           31.25    100.00

          TM1/TM4                TM2/TM5                H23/H56                TM3/TM6
CpTRIC-N  1  M N D F L F Y L D I F G V I V F A L S G A L M A G R Y Q L D P F G V V L A S V T A V G G G T I R D V I L Q T - P V F W E K P Y Y L Y V I L A T A I L T I V L I R Q P K R I
CpTRIC-C  83 P K R F L L I A D A L G L A L F A V L G T Q K A L Y L G A P I P V A V V L G T I T G I A G G M I R D V L C N V I P M I L R E E I Y A L A A M L G G S L F I L H G L N W N D T
      :   * : * : * * : *   *   .   .   : :   * : : *   * : * * : *   : *   .   .   *   *   *   .   : * :   * :   :
      1: CpTRIC-N           100.00    27.91
      2: CpTRIC-C           27.91    100.00

```

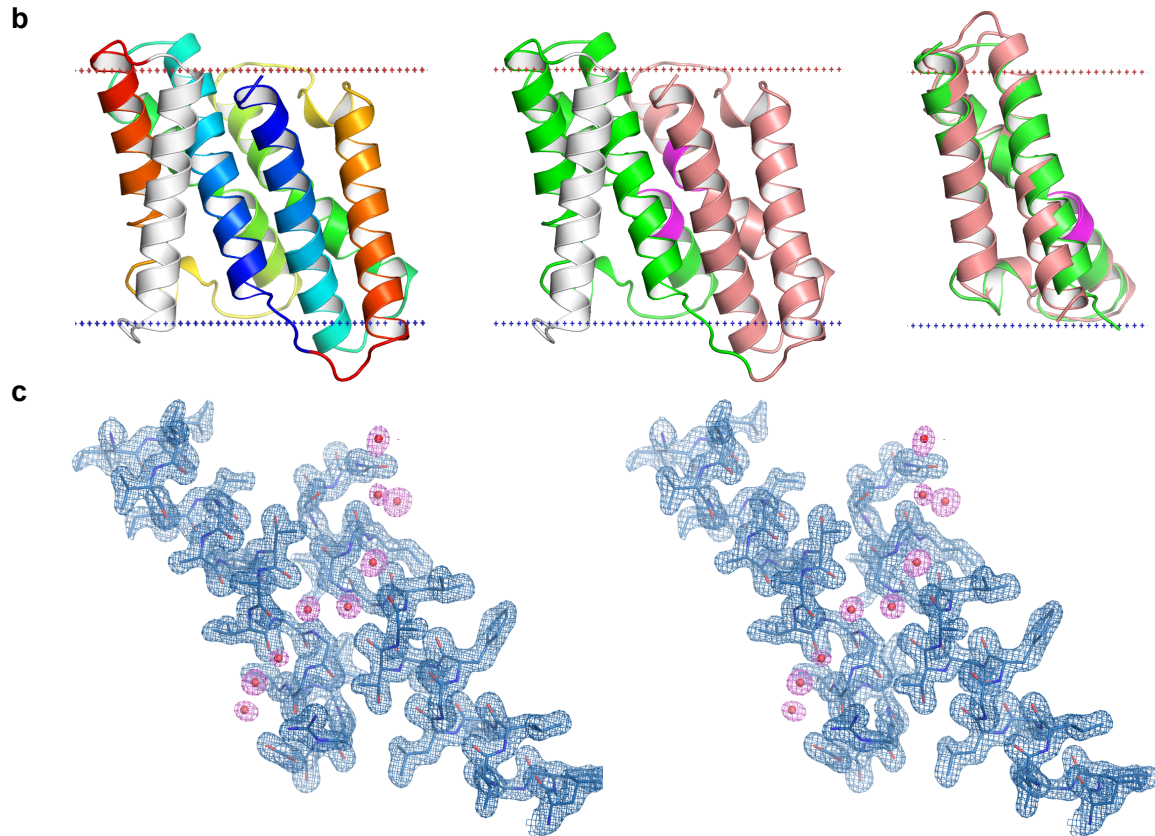

**Supplementary Figure 1**  
**The inverted repeats of triple-helix bundle (THB).**

**a.** Sequence alignments of N-THB (TM<sub>1-3</sub>) and C-THB (TM<sub>4-6</sub>). Superior coils define extents of the SaTRIC/CpTRIC helical segments; red letters mark residues that are involved in ion conduction pathway; **b.** Structural disposition of inverted repeat segments. Ribbon diagrams of a SaTRIC protomer are viewed from within the membrane plane with different coloring schemes: (left) spectral coloring from dark blue at the N-terminus to red at the C-terminus for each THB and with grey for TM<sub>7</sub>; (middle) N-THB in salmon and C-THB in green; (right) coloring as in the middle panel, but with N-THB superimposed onto the C-THB in the same orientation as in the middle. Membrane boundaries were calculated by OPM (Orientations of Proteins in Membranes) server; **c.** Stereo view of the kinked TM<sub>2</sub> and TM<sub>5</sub> helices. The experimental 2Fo-Fc map at 1.6 Å resolution is superimposed onto the SaTRIC model. Water molecules in the ion-conducting pore are shown with purple densities. All density contours are at 1.5  $\sigma$ .

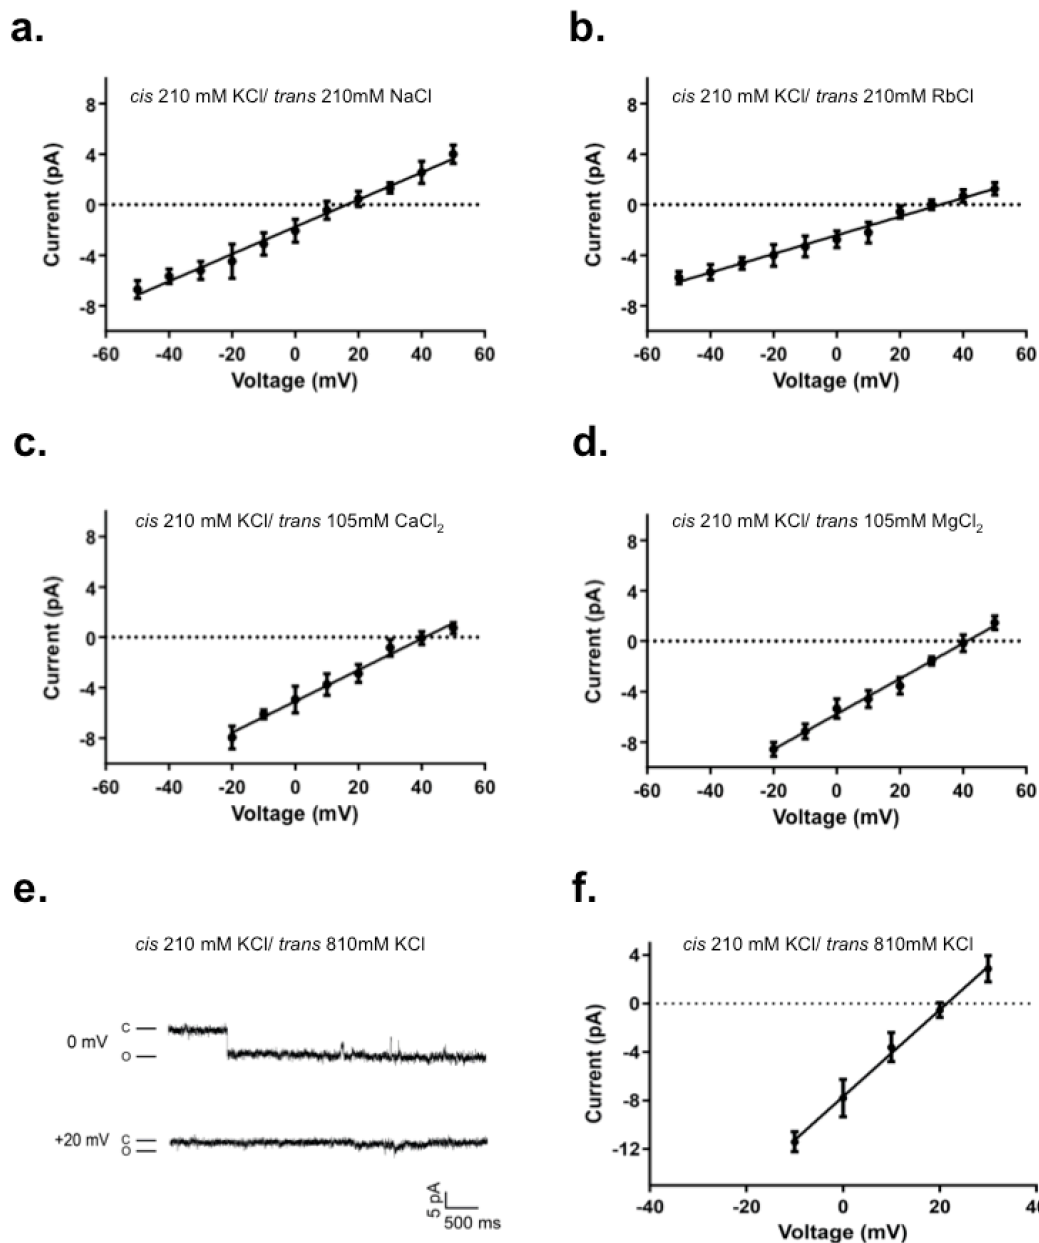

## Supplementary Figure 2

### The I-V plots and representative current traces for SaTRIC wild type and D99A mutant

(a-d) The I-V plots for SaTRIC wild type in different combination of solutions: **a**, I-V plot for *cis* 210 mM KCl/ *trans* 210mM NaCl; **b**, I-V plot for *cis* 210 mM KCl/ *trans* 210mM RbCl **c**, I-V plot for *cis* 210 mM KCl/ *trans* 105mM CaCl<sub>2</sub> **d**, I-V plot for *cis* 210 mM KCl/ *trans* 105mM MgCl<sub>2</sub>. Data are presented as mean  $\pm$  SEM (n=4 for each group). **(e)** Representative current traces of single SaTRIC D99A mutant channel at 0 mV and +20 mV (210 mM KCl in *cis*- and 810 mM KCl in *trans*- chamber). The current of SaTRIC D99A mutant channel is almost zero when the voltage is +20 mV. **(f)** Single SaTRIC D99A mutant channel current-voltage relationship. Data are presented as mean  $\pm$  SEM (n=3 for each point).



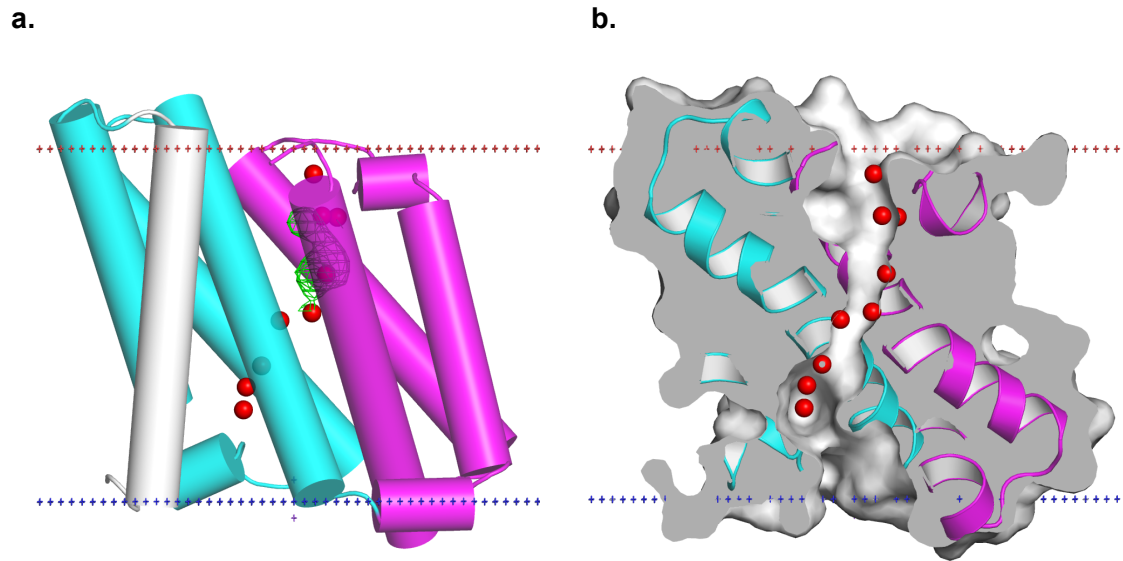

**Supplementary Figure 3**  
**Unmodelled density in the ion conducting pore (Type 3)**

**a**, Cylindrical helices drawing of SaTRIC structure (R32, Type 3), with N-THB in magenta, C-THB in cyan and TM<sub>7</sub> in white. A string of water molecules identified from the 1.8Å structure (P6<sub>3</sub>, Type 2a) was superimposed into the structure (R32, Type 3), an unmodelled density was shown in green. **b**, Cross-section through the SaTRIC(R32, Type 3). The model, cartoon presentation and water molecules are viewed as in a. Membrane boundaries were calculated as Fig. 2E.

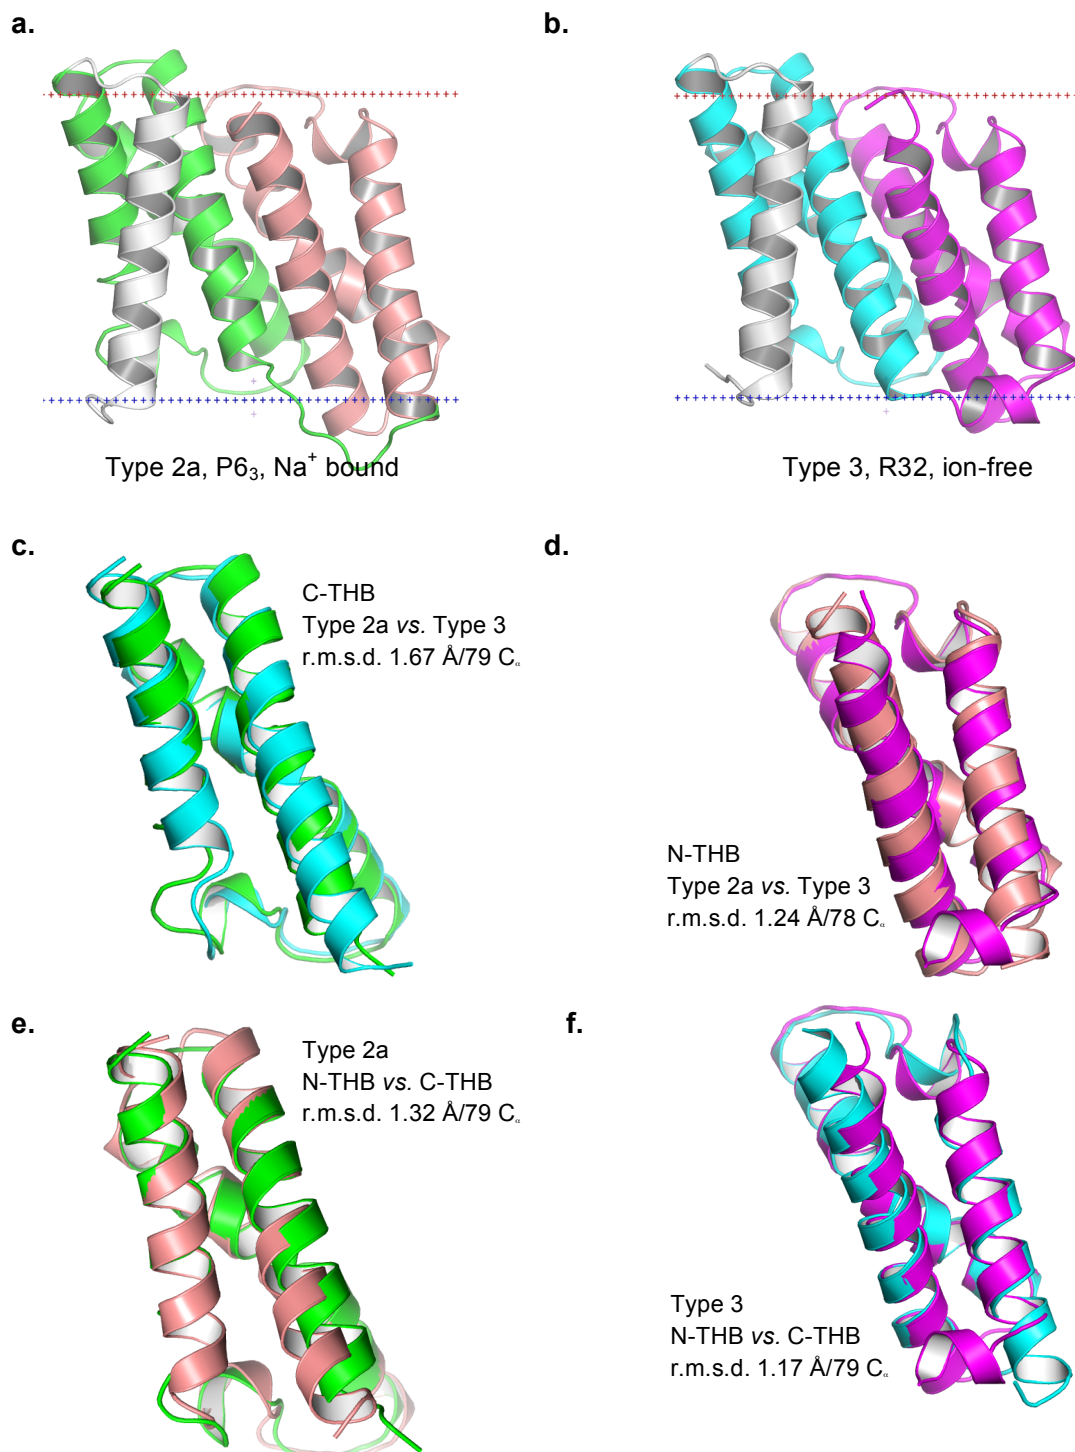

#### Supplementary Figure 4

#### Comparison of the structures from Type 2a and Type 3 crystals.

**a, b**, Ribbon diagram of the SaTRIC structures: Type 2a, with N-THB in salmon, C-THB in green; Type3, with N-THB in magenta, C-THB in cyan; both TM7 in white. **c**, superimposed C-THB, Type 2a in green(P63) v.s. Type 3 in cyan (R32); **d**, superimposed N-THB, Type 2a in salmon(P63) v.s. Type 3 in magenta (R32); **e**, superimposed N-THB onto C-THB for Type 2a, N-THB in green and C-THB in salmon; **d**, superimposed C-THB onto N-THB for Type 3, N-THB in cyan and C-THB in magenta.

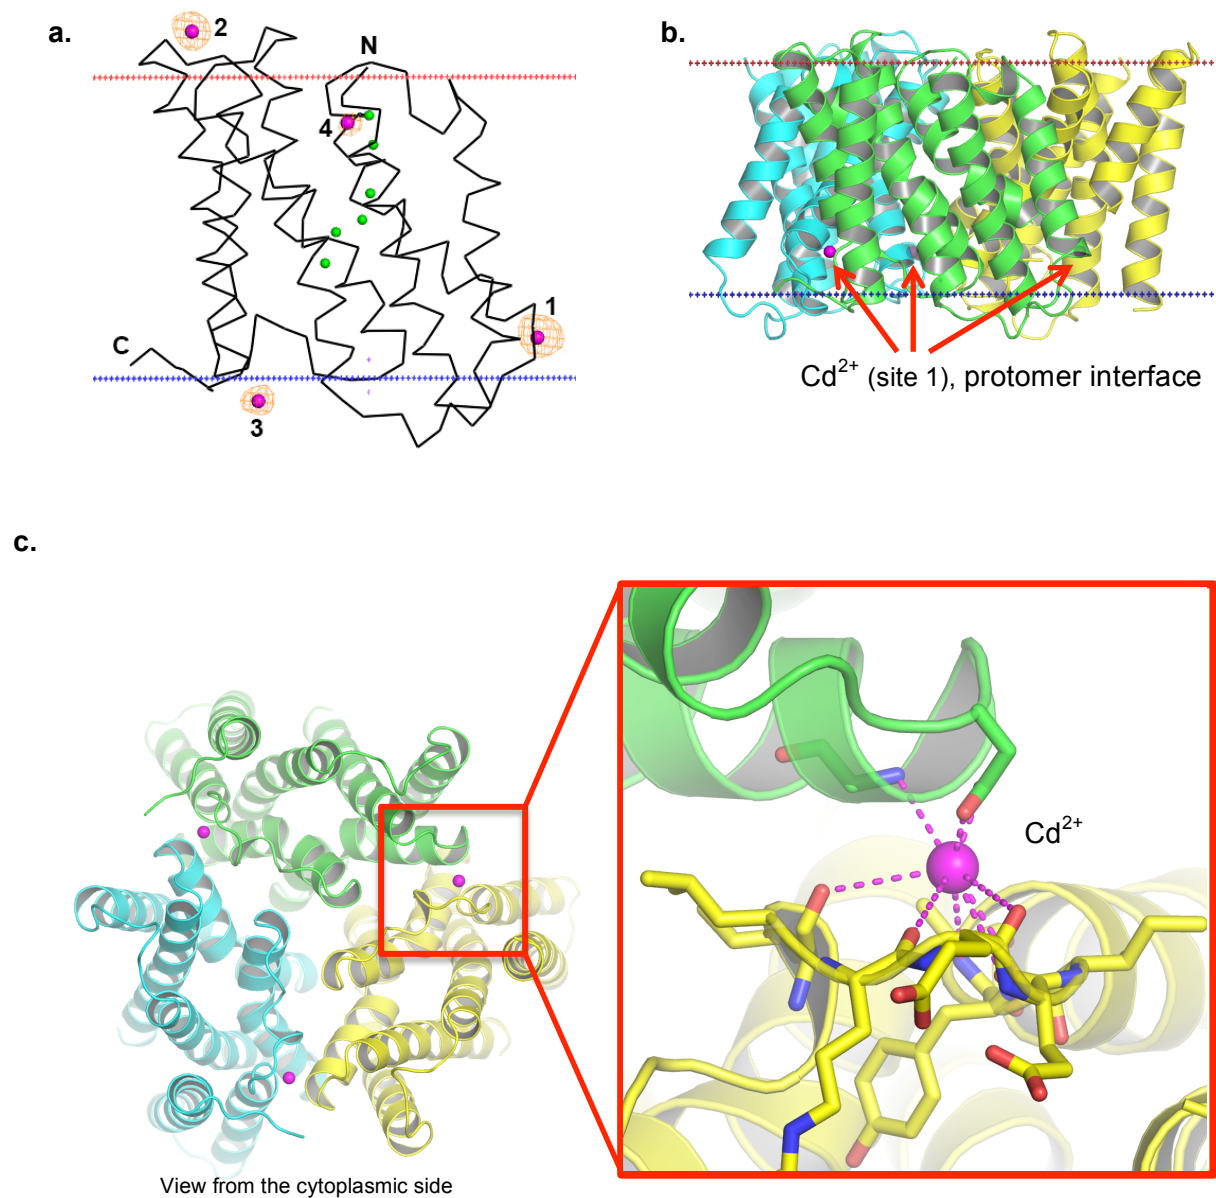

### Supplementary Figure 5 Ion bindings in the prokaryotic $CpTRIC$ .

**a**,  $C\alpha$  backbone diagram of  $Cd^{2+}$  bound  $CpTRIC$  protomer. Four bound  $Cd^{2+}$  ions are shown as purple spheres, Anomalous density contours are shown at  $3.5 \sigma$ .  $Cd^{2+}$  at site 1 is located near the protomer interface,  $Cd^{2+}$  at site 2 is involved in molecular packing in the R32 lattice,  $Cd^{2+}$  at site 3 is near the cytoplasmic side and  $Cd^{2+}$  at site 4 is located at entrance of the ion conducting pore near the extracellular side. Water molecules within the ion conducting pore are shown as green spheres. **b**, Ribbons diagram of  $Cd^{2+}$  bound  $CpTRIC$  trimer, with each protomer coloured in green, yellow and cyan.  $Cd^{2+}$  ion (site 1) bound to the protomer interface are shown as purple spheres. **c**, Left panel: Ribbon diagram of the  $CpTRIC$  trimer, as in **a**, but viewed from cytoplasmic side. Right panel: A zoom-up view of the  $Cd^{2+}$  interacting network, residues involved in interaction with  $Cd^{2+}$  (site 1) are shown.

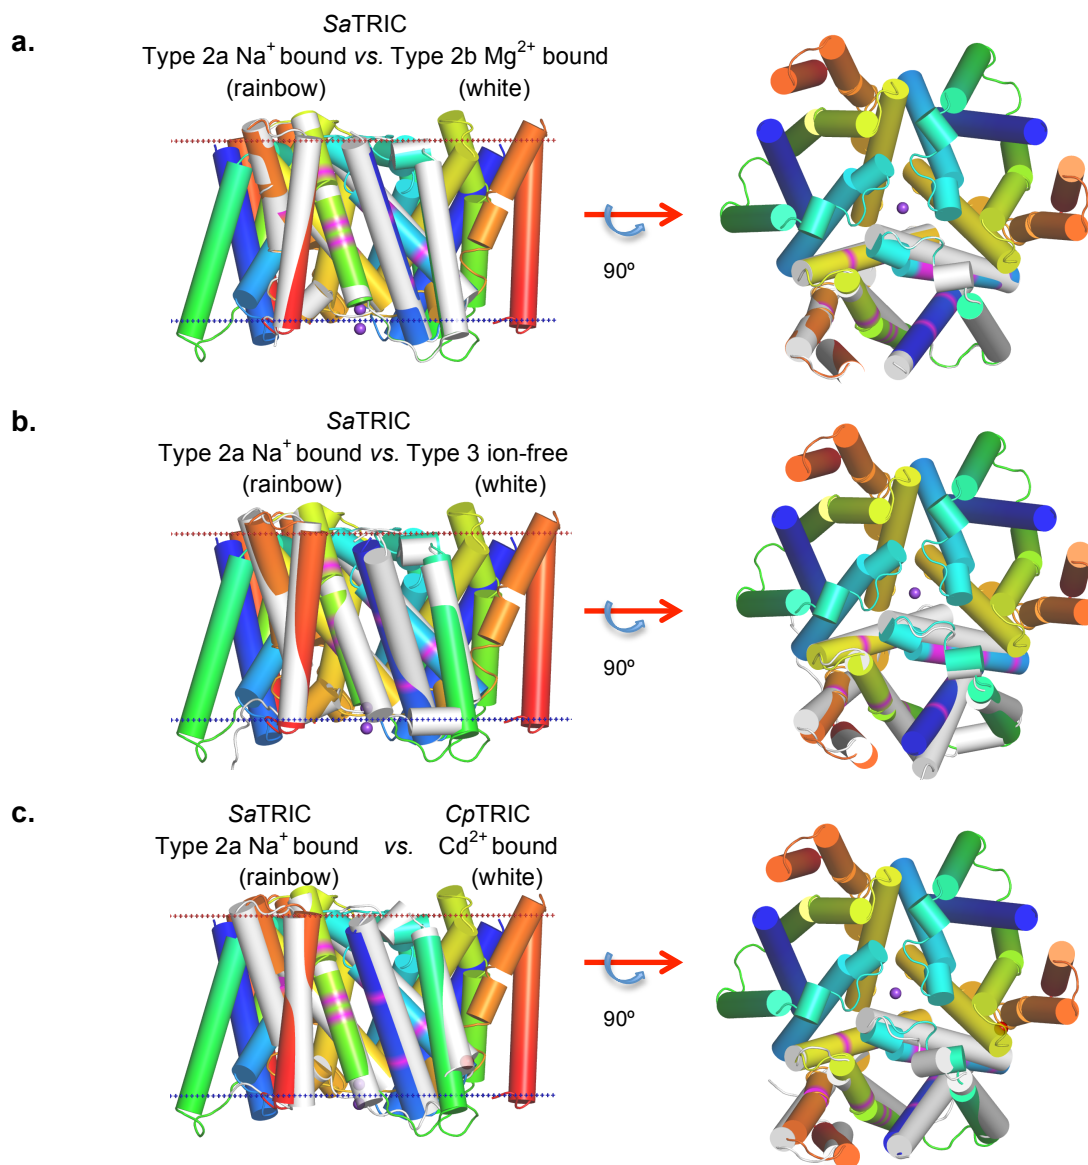

### Supplementary Figure 6

#### Ion binding v.s. re-orientation of pore-forming helices.

**a**, Cylindrical helices drawing of Na<sup>+</sup> bound SaTRIC trimer (P6<sub>3</sub>, Type 2a), with each protomer coloured spectrally from dark blue at its N-terminus to red at its C-terminus. The Mg<sup>2+</sup> bound structure (Type 2b) was superimposed, with only one protomer shown in grey. **b**, Cylindrical helices drawing of Na<sup>+</sup> bound SaTRIC trimer (P6<sub>3</sub>, Type 2a), with each protomer coloured spectrally from dark blue at its N-terminus to red at its C-terminus. The ion-free structure (Type 3) was superimposed, with only one protomer shown in grey. **a**, Cylindrical helices drawing of Na<sup>+</sup> bound SaTRIC trimer (P6<sub>3</sub>, Type 2a), with each protomer coloured spectrally from dark blue at its N-terminus to red at its C-terminus. The CpTRIC structure (Se-Met) was superimposed, with only one protomer shown in grey. Cd<sup>+</sup> ions bound to Asp 40 near the protomer interface are shown as purple spheres.

Left panel: as view in the membrane; Right panel, as viewed from outside of the membrane. Membrane boundaries were calculated by OPM (Orientations of Proteins in Membranes) server, as in Fig. 2E.

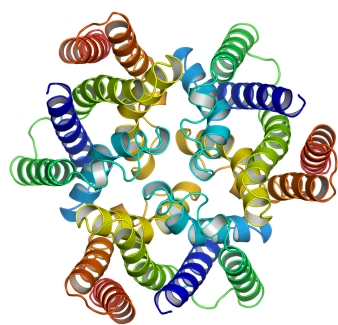

**SaTRIC**

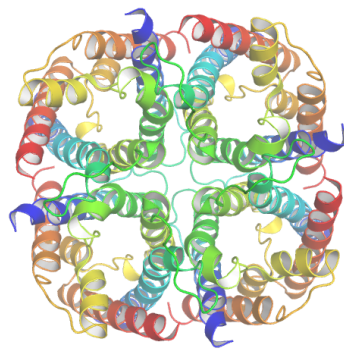

**AQP1**

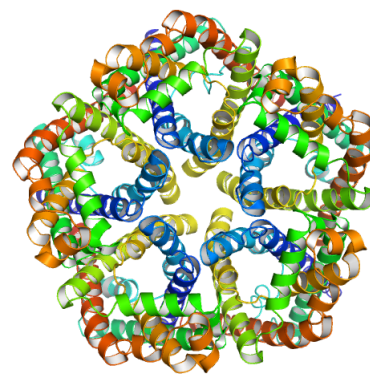

**FocA**

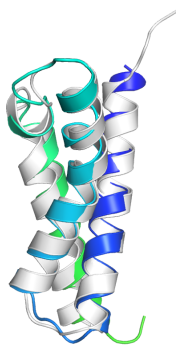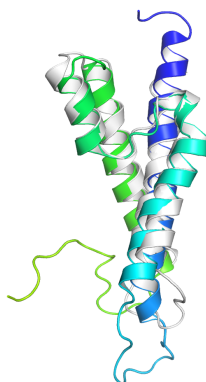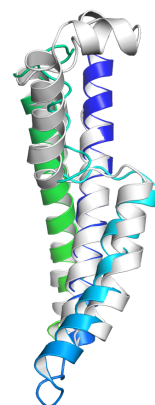

**Supplementary Figure 7**  
**Structural comparison of SaTRIC, AQP1 and FocA**

Upper panel: Ribbon diagram of SaTRIC (trimer), AQP1 (tetramer) and FocA (pentamer), as viewed from the extracellular side, coloured spectrally from dark blue at its N-terminus to red at its C-terminus for each protomer.

Lower panel: Ribbon diagram of the superimposed structural comparison of TM<sub>1-3</sub>, colored spectrally as in the upper panel, and TM<sub>4,6</sub>, colored in white, for each protomer of SaTRIC, AQP1 and FocA.
